# Supplementary material for: Improving Influenza HA-Vlps Production in Insect High Five Cells via Adaptive Laboratory Evolution
Source: MDPI journal article supplement (doi:10.3390/vaccines8040589), 2020-10-07
Supplement: s1 [file s1]

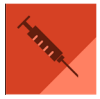

Supplementary Material

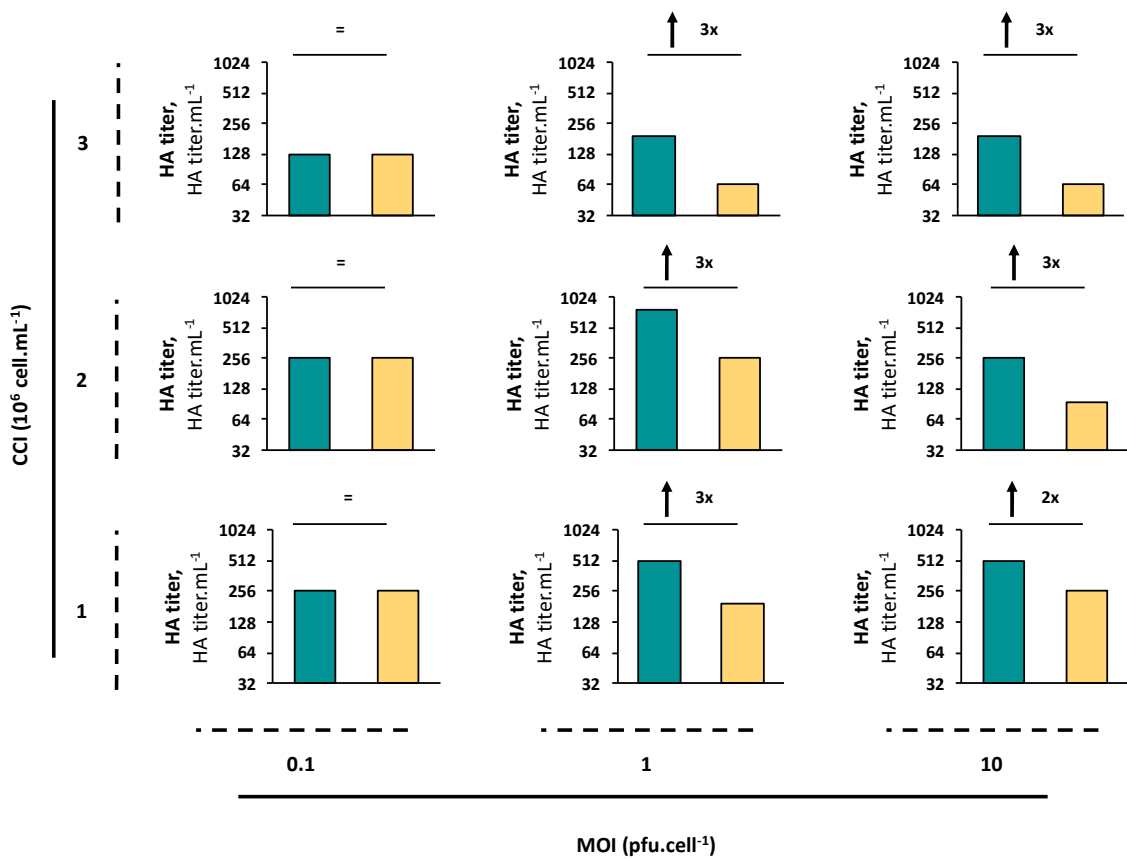

**Figure S1.** Extracellular HA titer (HA titer. mL<sup>-1</sup>) of adapted cells (dark grey) and non-adapted cells (light grey) at different CCI/MOI combinations. Arrows and symbols next to each graph represent the variations in HA titer at the time-of-harvest from non-adapted to adapted cells for each CCI/MOI combination.

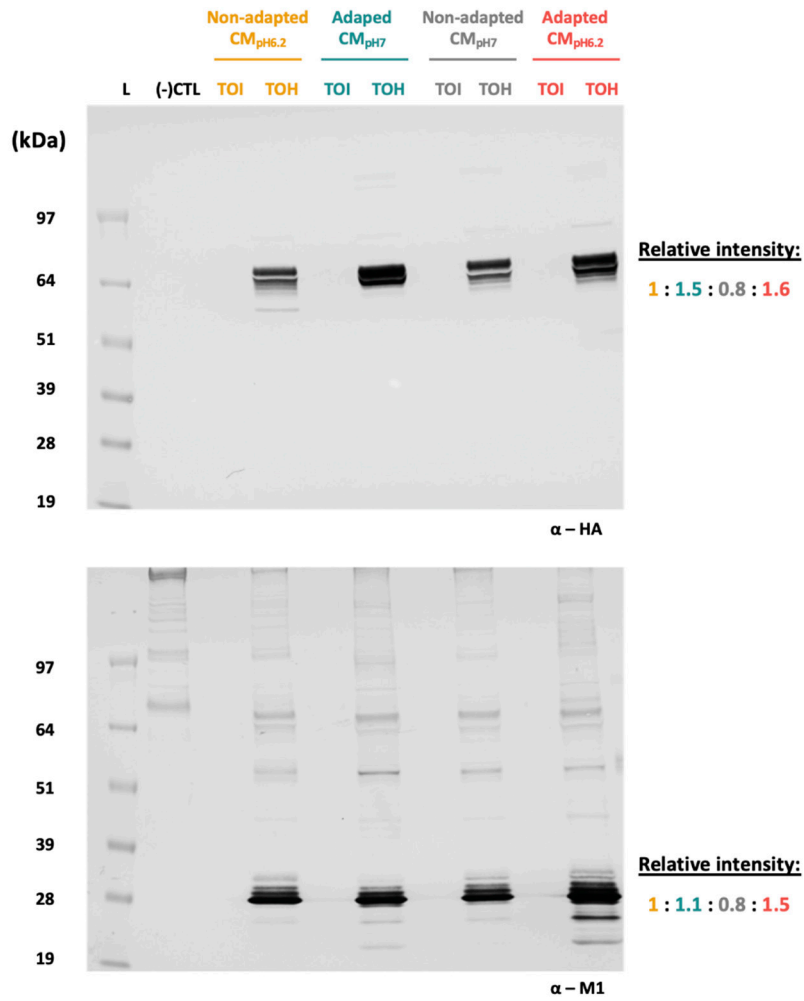

**Figure S2.** Identification of HA and M1 proteins by western blot; In-process samples were collected at the time-of-infection (TOI) and time-of-harvest (TOH) for adapted and non-adapted cells in neutral pH culture medium (CM<sub>pH7</sub>) or in standard pH 6.2 (CM<sub>pH6.2</sub>). Samples loaded are clarified supernatants, non-diluted; same volume was loaded in the gel for all samples. Band intensities for TOH samples are shown and are normalized to production performed with non-adapted cells in CM<sub>pH6.2</sub>.

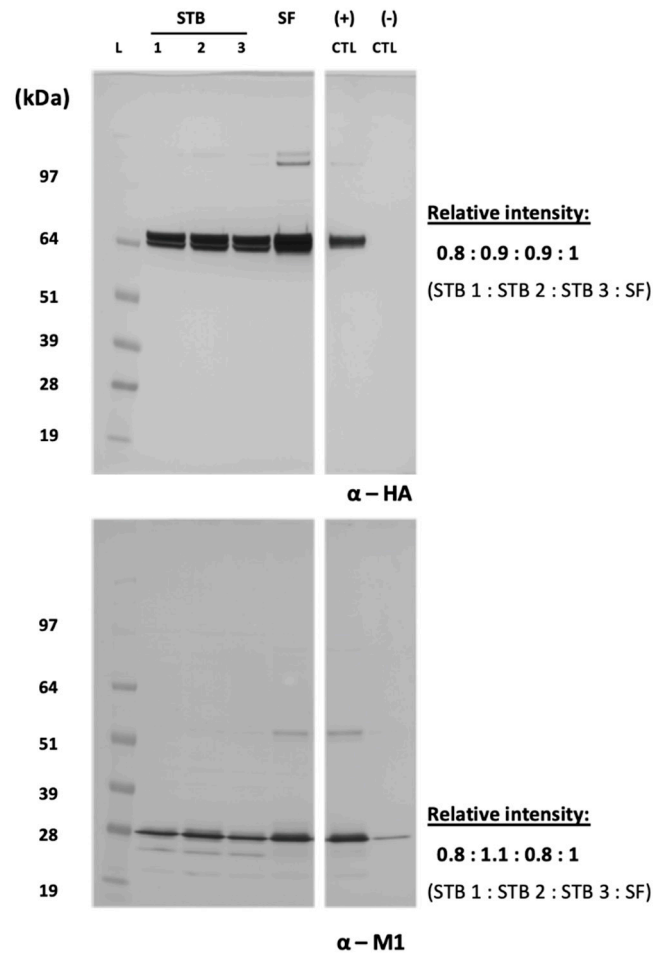

**Figure S3.** Identification of HA and M1 proteins by Western blot in in-process samples at the time of harvest from three STB cultures and one control SF culture. Samples loaded are clarified supernatants, non-diluted; same volume was loaded in the gel for all samples. (+) CTL (positive control): master virus seed stock used for influenza VLPs production. (-) CTL (negative control): supernatant of non-infected cell culture. L: Pre-stained protein standard SeeBlue® Plus2. Band intensities are normalized to production performed in SF.
